# Supplementary material for: Unique localization of the plastid-specific ribosomal proteins in the chloroplast ribosome small subunit provides mechanistic insights into the chloroplastic translation
Source: PubMed Central journal article supplement — Nucleic Acids Res. 2017 Jun 5;45(14):8581–95. doi: 10.1093/nar/gkx499 (PMC5737520; doi:10.1093/nar/gkx499), 2017-06-05

## **SUPPLEMENTARY ONLINE MATERIALS**

for

**Unique localization of the plastid specific ribosomal proteins in the chloroplast ribosome small subunit provides mechanistic insights into the chloroplastic translation**

Tofayel Ahmed<sup>1</sup>, Jian Shi<sup>2</sup> and Shashi Bhushan<sup>1,3,\*</sup>

<sup>1</sup>School of Biological Sciences, Nanyang Technological University, Singapore

<sup>2</sup>Center for BioImaging Sciences, National University of Singapore, Singapore

<sup>3</sup>NTU Institute of Structural Biology, Nanyang Technological University, Singapore

\* To whom correspondence should be addressed. Tel: +65 6592 3673; Fax: +65 6791 3856;

E-mail: sbhushan@ntu.edu.sg

**Figure S1: Purification of the chloroplast 70S ribosome and estimation of local resolution.**

**(a)** Purification of the chloroplast 70S ribosome through sucrose density gradient centrifugation. Absorbance was measured at 280 nm and is represented by the red curve. Fractions corresponding to 70S chloroplast ribosomes were pooled (dotted lined box). **(b)** Representative micrograph collected at -2.9  $\mu\text{m}$  defocus showing distribution of chloroplast ribosome particles. **(c)** Examples of representative 2D classes denoting a mixture of 50S and 70S chloroplast ribosome particles in the dataset. **(d)** Local resolution estimation using ResMap (1). Solvent exposed and sliced views are presented showing better resolved density at the core of the EM reconstructions while peripheral regions show relatively poor-resolved density. **(e)** Refinement validation. Red: Fourier Shell Correlation (FSC) curves are displayed for the 70S, 50S and 30S EM reconstructions with estimated resolution of 3.36  $\text{\AA}$ , 3.3  $\text{\AA}$  and 3.73  $\text{\AA}$ , respectively (FSC=0.143 criterion) (2). Black: FSC curves generated from the final cryo-EM maps and maps derived from the refined atomic coordinates; FSC=0.5 criterion was used to report resolution.

**Figure S2: Cryo-EM data processing.** **(a)** From 3161 micrographs collected, 1285 turned out to be of good quality possessing minimal drift and no astigmatism. From these 1285 micrographs, 188K particles were semi-automatically picked using e2boxer.py of EMAN 2.1 (3). Data was processed using RELION 1.4 (4). 2X-binned particles were sorted using 2D classification generating 133K good particles which were subjected to 3D classification using a chloroplast ribosome 70S map as reference (5). 3D classification sorted out the bad and the 50S particles from the dataset. To reconstruct high-resolution maps of the 70S ribosome, 81K good 70S particles were refined using unbinned particles, generating a 3.66  $\text{\AA}$ -resolved 70S map which yielded a 3.36  $\text{\AA}$ -resolved map after inclusion of the movie frames in subsequent 3D refinement steps. Application of masks on the ribosomal subunits rendered maps of the LSU at

3.3 Å and of the SSU at 3.7 Å. **(b)** Molecular surface representation of the LSU model, built in our 3.3 Å map, based on our earlier LSU structure (5). Constituent proteins and rRNAs are indicated. Models for uL1c, uL10c, uL11c and bL12c could not be generated due to flexibility.

**Figure S3: Local agreement between cryo-EM map and model.** The final 70S, 50S and 30S cryo-EM maps of chloroplast ribosome coloured based on local correlation values between the final cryo-EM maps and the maps derived from atomic coordinates.

**Figure S4: Representative density displaying map quality.** **(a)** Representative density from 3.3 Å LSU map showing a 23S rRNA region surrounding G2379 (denoted by a star), interacting with protein bL35c (in green). **(b)** Representative density from 3.7 Å SSU map showing a 16S rRNA region surrounding U1137 (denoted by a star), interacting with protein uS3c (in pink).

**Figure S5: Constituent proteins of the chloroplast ribosome SSU.** Isolated densities for the chloroplast ribosome SSU proteins are in blue meshes with fitted models in dark red (left). The chloroplast SSU protein models overlaid with the corresponding homologous *E. coli* protein models (6) in grey for comparison. Density for cS22 is filtered to 8 Å for better visualization of the connecting density between the two RNA recognition motif (RRM) domains. Plastid specific protein extensions are colored in green.

**Figure S6: mRNA entry site** **(a)** The overall architecture of the mRNA entry sites in ribosomes from bacteria (PDB ID: 4YBB) (6), chloroplast and mitochondria (PDB ID: 5AJ3) (7) are compared to show unique features. rRNAs are in grey spheres. The structural landmarks of the ribosome are indicated. **(b)** Zoomed-in view of the mRNA entry sites from all three ribosomes (SSU) displayed in (a). The mRNA entry sites are marked with asterisks and the proteins in close

vicinity are displayed. Compared to bacteria, mRNA entry site in chloroplast ribosome appears to be constricted due to the presence of N-terminal extension in uS5c.

**Figure S7: cS23 localizes to the mRNA exit site and comparison between the mRNA exit sites of bacterial, chloroplastic and mitochondrial ribosomes** (a) *T. thermophilus* ribosome SSU from PDB ID: 4V6F (8) (grey) overlaid with chloroplast ribosome SSU displaying localization of cS23 closer to the site of SD-anti SD interaction in bacterial ribosomes (b) The overall architecture of the mRNA exit sites in bacterial (PDB ID: 4YBB) (6), chloroplast and mitochondrial (PDB ID: 5AJ3) (7) ribosomes are compared to show unique features. rRNAs are rendered in grey atoms. Proteins are colored golden rod, except for those that contribute in the formation of the mRNA exit sites. (c) Zoomed-in view of the mRNA exit sites from all three ribosomes depicted in (b). The mRNA exit sites are marked with asterisks and the proteins in close vicinity are displayed. Unique localization of cS23 at the mRNA exit site of the chloroplast ribosome makes the site narrower compared to bacteria.

**Figure S8: Plastid pY is homologous to bacterial cold shock protein pY** (a) Model of plastid pY (NTD) overlaid with *E. coli* cold shock protein pY (PDB ID: 4Y4O) (9) to show the presence of an extra loop between  $\beta 2$  and  $\beta 3$  in plastid pY. (b) Global sequence alignment between plastid pY and bacterial pY using EMBOSS Needle online server (10). Due to the presence of C-terminal extension for which we didn't observe any density, plastid pY is doubled in length than bacterial pY.

**Figure S9: Conserved intersubunit bridges of the chloroplast 70S ribosome.** Most of the intersubunit bridges are conserved in chloroplast ribosomes compared to bacterial ribosomes except for B7b which is absent from the chloroplast ribosome. Absence of B7b is replaced by the novel bridge B7c (refer main text, Fig. 6). Although, protein-protein (b), protein-rRNA (a, c, g,

h, j and l) and rRNA-rRNA (d, e, f, i and k) interactions contribute in the formation of the bridges, rRNA-rRNA type of interactions are the predominant types. The densities for the individual bridges are isolated and are shown in transparent surface (grey). The densities are low-pass filtered for better visualization.

**Supplementary Table S1. Data collection and refinement statistics**

| <b>Data Collection</b>                          | <b>70S ribosome</b> | <b>30S subunit</b> | <b>50S subunit</b> |
|-------------------------------------------------|---------------------|--------------------|--------------------|
| Particles                                       | 81305               | 81305              | 81305              |
| Pixel Size (Å)                                  | 1.05                | 1.05               | 1.05               |
| Defocus Range (μM)                              | 0.4-3.7             | 0.4-3.7            | 0.4-3.7            |
| Voltage (kV)                                    | 300                 | 300                | 300                |
| Electron Dose (e <sup>-</sup> Å <sup>-2</sup> ) | 37.5                | 37.5               | 37.5               |

| <b>Model composition</b> |         |        |        |
|--------------------------|---------|--------|--------|
| Non-hydrogen atoms       | 146,970 | 54,641 | 92,329 |
| Protein residues         | 6,167   | 2,859  | 3308   |
| RNA bases                | 4,496   | 1478   | 3018   |

| <b>Refinement</b>                         |       |       |       |
|-------------------------------------------|-------|-------|-------|
| Resolution (Å)                            | 3.36  | 3.73  | 3.30  |
| Map sharpening B-factor (Å <sup>2</sup> ) | -72.6 | -97.9 | -89.6 |
| CC <sub>map model</sub> (whole unit cell) | 0.775 | 0.778 | 0.713 |

| <b>RMS deviation</b> |      |      |      |
|----------------------|------|------|------|
| Bonds (Å)            | 0.01 | 0.02 | 0.01 |
| Angles (°)           | 1.31 | 1.54 | 1.17 |

| <b>Validation (proteins)</b> |       |       |       |
|------------------------------|-------|-------|-------|
| Molprobit score              | 2.59  | 2.86  | 2.16  |
| Clashscore, all atoms        | 8.58  | 13.01 | 6.15  |
| Poor rotamers (%)            | 1.26  | 1.54  | 1.02  |
| Favoured rotamers (%)        | 94.78 | 94.95 | 94.63 |

| <b>Ramachandran plot</b> |       |       |       |
|--------------------------|-------|-------|-------|
| Favored (%)              | 85.97 | 85.76 | 86.17 |
| Outliers (%)             | 0.85  | 1.61  | 0.18  |

| <b>Validation (RNA)</b>         |       |       |       |
|---------------------------------|-------|-------|-------|
| Correct sugar puckers (%)       | 99.78 | 99.80 | 99.77 |
| Good backbone conformations (%) | 77.48 | 78.56 | 76.95 |

**Supplementary Table S2. Components of spinach chloroplast ribosome LSU model.** The nomenclature of the ribosomal proteins is based on Ban *et al* (11).

| Protein/RNA name | Old Name | Chain ID | Uniprot ID (GenBank ID) | Mature protein (range, aa) | Built residues (range, aa) | Size of homologous <i>E. coli</i> proteins (aa) | Comments                               |
|------------------|----------|----------|-------------------------|----------------------------|----------------------------|-------------------------------------------------|----------------------------------------|
| uL1c             | RPL1     |          | Q9LE95                  | 73-352                     |                            | 234                                             | Poor density, model could not be built |
| uL2c             | RPL2     | C        | P06509                  | 1-272                      | 23-269                     | 273                                             |                                        |
| uL3c             | RPL3     | D        | (KNA04906.1)            | 85-305                     | 86-297                     | 209                                             |                                        |
| uL4c             | RPL4     | E        | O49937                  | 51-293                     | 52-261                     | 201                                             |                                        |
| uL5c             | RPL5     | F        | (KNA19821.1)            | 39-258                     | 56-230                     | 179                                             |                                        |
| uL6c             | RPL6     | G        | (KNA14466.1)            | 39-220                     | 42-214                     | 177                                             |                                        |
| bL9c             | RPL9     | H        | (KNA21690.1)            | 42-196                     | 43-95                      | 149                                             |                                        |
| uL10c            | RPL10    | I        | (KNA14105.1)            | 53-232                     |                            | 165                                             | Poor density, model could not be built |
| uL11c            | RPL11    | J        | P31164                  | 67-224                     |                            | 142                                             | Poor density, model could not be built |
| bL12c            | RPL12    |          | P02398                  | 57-189                     |                            | 121                                             | Poor density, model could not be built |
| uL13c            | RPL13    | K        | P12629                  | 54-250                     | 54-246                     | 142                                             |                                        |
| uL14c            | RPL14    | L        | P09596                  | 1-121                      | 1-121                      | 123                                             |                                        |
| uL15c            | RPL15    | M        | (KNA06817.1)            | 80-271                     | 80-256                     | 144                                             |                                        |
| uL16c            | RPL16    | N        | P17353                  | 1-135                      | 2-135                      | 136                                             |                                        |
| bL17c            | RPL17    | O        | (KNA19692.1)            | 11-126                     | 11-126                     | 127                                             |                                        |
| uL18c            | RPL18    | P        | (KNA08833.1)            | 44-166                     | 47-166                     | 117                                             |                                        |
| bL19c            | RPL19    | Q        | P82413                  | 78-233                     | 115-232                    | 115                                             |                                        |
| bL20c            | RPL20    | R        | P28803                  | 1-128                      | 3-117                      | 118                                             |                                        |
| bL21c            | RPL21    | S        | P24613                  | 56-256                     | 88-234                     | 103                                             |                                        |
| uL22c            | RPL22    | T        | P09594                  | 1-199                      | 26-169                     | 110                                             |                                        |
| uL23c            | RPL23    | U        | Q9LWB5                  | 77-198                     | 102-193                    | 100                                             |                                        |
| uL24c            | RPL24    | V        | P27683                  | 47-191                     | 50-173                     | 104                                             |                                        |
| bL27c            | RPL27    | X        | (KNA14420.1)            | 58-194                     | 66-165                     | 85                                              |                                        |
| bL28c            | RPL28    | Y        | (KNA16864.1)            | 72-148                     | 72-145                     | 78                                              |                                        |
| uL29c            | RPL29    | Z        | (KNA15596.1)            | 60-168                     | 63-152                     | 63                                              |                                        |
| bL31c            | RPL31    | 0        | (KNA12538.1)            | 37-130                     | 38-101                     | 70                                              | Poor density                           |
| bL32c            | RPL32    | 1        | P28804                  | 1-57                       | 2-47                       | 57                                              |                                        |
| bL33c            | RPL33    | 2        | P28805                  | 1-66                       | 9-59                       | 55                                              |                                        |
| bL34c            | RPL34    | 3        | P82244                  | 91-152                     | 91-147                     | 46                                              |                                        |
| bL35c            | RPL35    | 4        | P23326                  | 87-159                     | 89-157                     | 65                                              |                                        |
| bL36c            | RPL36    | 5        | P12230                  | 1-37                       | 1-37                       | 38                                              |                                        |
| cL37             | PSRP5    | 6        | P27684                  | 63-142                     | 94-142                     |                                                 |                                        |

|           |       |   |            |                     |        |  |  |
|-----------|-------|---|------------|---------------------|--------|--|--|
| cL38      | PSRP6 | 7 | P82411     | 48-116              | 48-93  |  |  |
| 23S rRNA  |       | A | AJ400848.1 | 2810<br>nucleotides | 1-2810 |  |  |
| 5S rRNA   |       | B | AJ400848.1 | 121<br>nucleotides  | 3-119  |  |  |
| 4.8S rRNA |       | W | AJ400848.1 | 106<br>nucleotides  | 5-106  |  |  |

Abbreviations: PSRP=Plastid-specific ribosomal proteins.



**Supplementary Table S3. Components of spinach chloroplast ribosome SSU model.** The nomenclature of the ribosomal proteins is based on Ban *et al* (11).

| Protein/RNA name | Old Name | Chain ID | Uniprot ID (GenBank ID) | Mature protein (range, aa) | Built residues (range, aa) | Size of homologous <i>E. coli</i> proteins (aa) | Comments                                                                            |
|------------------|----------|----------|-------------------------|----------------------------|----------------------------|-------------------------------------------------|-------------------------------------------------------------------------------------|
| bS1c             | RPS1     | 8        | P29344                  | 370                        | 49-74, 249-377             | 557                                             | Poor density. N- and C-terminal extensions, and OB domain was rigid body fitted     |
| uS2c             | RPS2     | b        | P08242                  | 236                        | 5-231                      | 241                                             |                                                                                     |
| uS3c             | RPS3     | c        | P09595                  | 217                        | 3-215                      | 233                                             |                                                                                     |
| uS4c             | RPS4     | d        | P13788                  | 200                        | 2-197                      | 206                                             |                                                                                     |
| uS5c             | RPS5     | e        | Q9ST69                  | 253                        | 138-308                    | 167                                             |                                                                                     |
| bS6c             | RPS6     | f        | P82403                  | 146                        | 97-207                     | 131                                             |                                                                                     |
| uS7c             | RPS7     | g        | P82129                  | 154                        | 4-152                      | 179                                             |                                                                                     |
| uS8c             | RPS8     | h        | P09597                  | 133                        | 1-134                      | 130                                             |                                                                                     |
| uS9c             | RPS9     | i        | P82278                  | 157                        | 63-195                     | 130                                             |                                                                                     |
| uS10c            | RPS10    | j        | (KNA23234.1)            | 122                        | 98-195                     | 103                                             |                                                                                     |
| uS11c            | RPS11    | k        | P06506                  | 137                        | 21-138                     | 129                                             |                                                                                     |
| uS12c            | RPS12    | l        | P62128                  | 122                        | 1-123                      | 124                                             |                                                                                     |
| uS13c            | RPS13    | m        | P82163                  | 126                        | 32-141                     | 118                                             |                                                                                     |
| uS14c            | RPS14    | n        | P06507                  | 99                         | 2-100                      | 101                                             |                                                                                     |
| uS15c            | RPS15    | o        | Q9M314                  | 90                         | 21-82                      | 89                                              |                                                                                     |
| bS16c            | RPS16    | p        | P28807                  | 88                         | 1-80                       | 82                                              |                                                                                     |
| uS17c            | RPS17    | q        | (KNA21507.1)            | 108                        | 58-135                     | 84                                              |                                                                                     |
| bS18c            | RPS18    | r        | Q9M3K7                  | 101                        | 21-84                      | 75                                              |                                                                                     |
| uS19c            | RPS19    | s        | P06508                  | 91                         | 7-84                       | 92                                              |                                                                                     |
| bS20c            | RPS20    | t        | *                       | 108                        | 76-180                     | 87                                              |                                                                                     |
| bS21c            | RPS21    | u        | KNA18384.1              | 137                        | 95-138                     | 71                                              |                                                                                     |
| bTHXc            | PSRP4    | x        | P47910                  | 47                         |                            |                                                 |                                                                                     |
| cS22             | PSRP2    | v        | P82277                  | 198                        | 71-260                     |                                                 | Two RRM domains individually rigid body fitted. Helical linker was added thereafter |
| cS23             | PSRP3    | w        | P82412                  | 121                        | 96-179                     |                                                 | Core fold rigid body fitted                                                         |
| plastid pY       | PSRP1    | y        | P19954                  | 236                        | 70-177                     | 113                                             |                                                                                     |
| 16S rRNA         |          | a        | AJ400848.1              | 1491 nucleotides           | 1-1488                     |                                                 |                                                                                     |

Abbreviations: PSRP=Plastid-specific ribosomal proteins.

\* Due to absence of bS20c sequence information in the publicly available databases, sequence information was extracted by performing BLAST search against the spinach genome (<http://bvseq.molgen.mpg.de>) (12).

**Supplementary Table S4. Components of the intersubunit bridges in spinach chloroplast 70S ribosome**

| Bridge | SSU component                                                 | LSU component                                              | Type |
|--------|---------------------------------------------------------------|------------------------------------------------------------|------|
| B1a    | uS13c: Ile111, Glu112, Arg113                                 | 23S: H38 (A-site finger): 896-900                          | R-P  |
| B1b    | uS13c: Ile37                                                  | uL5c: Arg163, Thr164                                       | P-P  |
|        | uS13c: Glu96, Val97                                           | uL5c: Arg165, Asp166                                       | P-P  |
|        | uS13c: Arg113                                                 | bL31c: C-terminal*                                         | P-P  |
| B1c    | uS14c: Asp39, Lys40                                           | bL31c: C-terminal*                                         | P-P  |
|        | uS19c: Pro9, Pro42                                            | bL31c: C-terminal*                                         | P-P  |
|        | 16S: h42 (A1259, G1260)                                       | bL31c: C-terminal*                                         | R-P  |
| B2a/d  | 16S: h44 (U1444)                                              | 23S: H69 (A1926)                                           | R-R  |
|        | 16S: h44 (C1445)                                              | 23S: H69 (C1934)                                           | R-R  |
|        | 16S: h44 (C1356, A1357)                                       | 23S: H69 (A1932, A1933)                                    | R-R  |
|        | 16S: h45 (G1466)                                              | 23S: H69 (A1933)                                           | R-R  |
|        | 16S: h24 (739)                                                | 23S: H69 (G1935, G1936)                                    | R-R  |
| B2b    | 16S: h24 (G732)                                               | 23S: H68 (C1846, C1847)                                    | R-R  |
| B2c    | 16S: h27 (C848, A849)                                         | 23S: G1841, C1842                                          | R-R  |
| B3     | 16S: h44 (C1369, U1370, G1371, G1372)                         | uL14c: Pro48, Asn49, Arg54                                 | R-P  |
|        | 16S: h44 (G1431, A1432, C1433, G1366, A1367, G1368)           | 23S: H71 (C1961, G1962, G1963, C1972, G1973, A1974)        | R-R  |
| B4     | uS15c: Ile33, Thr37, Leu40, Glu41, Gln50, Leu53, Arg54, Leu57 | 23S: H34 (U725, G726, A727)                                | R-P  |
|        | 16S: h20 (G710)                                               | 23S: H34 (A729)                                            | R-R  |
| B5     | 16S: h44 (U1376, G1377, C1378, A1422, G1423, G1424)           | 23S: H62 (C1722, G1723, A1725, A1737, G1738, G1739, G1740) | R-R  |
| B6     | 16S: h44 (C1380, G1381)                                       | bL19c: Arg228                                              | R-P  |

|     |                                            |                                              |     |
|-----|--------------------------------------------|----------------------------------------------|-----|
| B7a | 16S: h23 (A650)                            | 23S: H68 (G1856, A1857, A1858, C1908, C1909) | R-R |
| B7b | Not observed in our cryo-EM reconstruction |                                              |     |
| B7c | bS6c: Lys161**, Ala162**                   | uL2c: Pro132, Leu133, Ala162, Lys163         | P-P |
| B8  | 16S: h14 (A315, C316, G317)                | bL19c: Lys159, Arg160                        | R-P |
|     | 16S: h14 (G308, A309)                      | uL14c: Arg97                                 | R-P |

Abbreviations: R-R=RNA-RNA, R-P=RNA-protein, P-P=Protein-protein

## SUPPLEMENTARY REFERENCES

1. Kucukelbir, A., Sigworth, F.J. and Tagare, H.D. (2014) Quantifying the local resolution of cryo-EM density maps. *Nat Methods*, **11**, 63-65.
2. Rosenthal, P.B. and Henderson, R. (2003) Optimal Determination of Particle Orientation, Absolute Hand, and Contrast Loss in Single-particle Electron Cryomicroscopy. *Journal of Molecular Biology*, **333**, 721-745.
3. Bell, J.M., Chen, M., Baldwin, P.R. and Ludtke, S.J. (2016) High resolution single particle refinement in EMAN2.1. *Methods*, **100**, 25-34.
4. Scheres, S.H. (2012) RELION: implementation of a Bayesian approach to cryo-EM structure determination. *J Struct Biol*, **180**, 519-530.
5. Ahmed, T., Yin, Z. and Bhushan, S. (2016) Cryo-EM structure of the large subunit of the spinach chloroplast ribosome. *Sci Rep*, **6**, 35793.
6. Noeske, J., Wasserman, M.R., Terry, D.S., Altman, R.B., Blanchard, S.C. and Cate, J.H.D. (2015) High-resolution structure of the Escherichia coli ribosome. *Nat Struct Mol Biol*, **22**, 336-341.
7. Greber, B.J., Bieri, P., Leibundgut, M., Leitner, A., Aebersold, R., Boehringer, D. and Ban, N. (2015) Ribosome. The complete structure of the 55S mammalian mitochondrial ribosome. *Science*, **348**, 303-308.
8. Jenner, L.B., Demeshkina, N., Yusupova, G. and Yusupov, M. (2010) Structural aspects of messenger RNA reading frame maintenance by the ribosome. *Nat Struct Mol Biol*, **17**, 555-560.
9. Polikanov, Y.S., Melnikov, S.V., Soll, D. and Steitz, T.A. (2015) Structural insights into the role of rRNA modifications in protein synthesis and ribosome assembly. *Nat Struct Mol Biol*, **22**, 342-344.
10. Rice, P., Longden, I. and Bleasby, A. (2000) EMBOSS: the European Molecular Biology Open Software Suite. *Trends Genet*, **16**, 276-277.
11. Ban, N., Beckmann, R., Cate, J.H., Dinman, J.D., Dragon, F., Ellis, S.R., Lafontaine, D.L., Lindahl, L., Liljas, A., Lipton, J.M. *et al.* (2014) A new system for naming ribosomal proteins. *Curr Opin Struct Biol*, **24**, 165-169.
12. Dohm, J.C., Minoche, A.E., Holtgrawe, D., Capella-Gutierrez, S., Zakrzewski, F., Tafer, H., Rupp, O., Sorensen, T.R., Stracke, R., Reinhardt, R. *et al.* (2014) The genome of the recently domesticated crop plant sugar beet (*Beta vulgaris*). *Nature*, **505**, 546-549.

# Figure S1

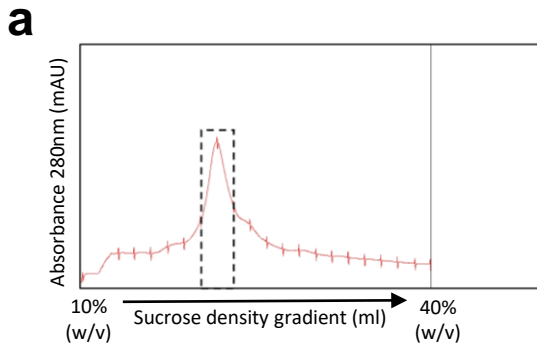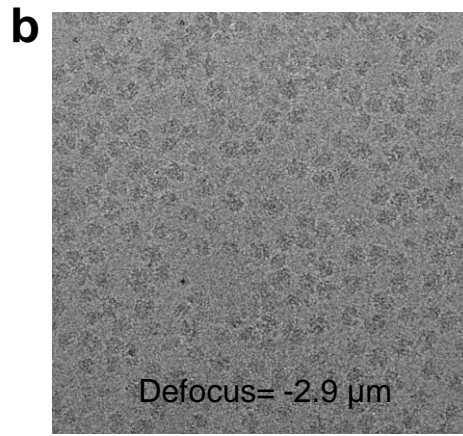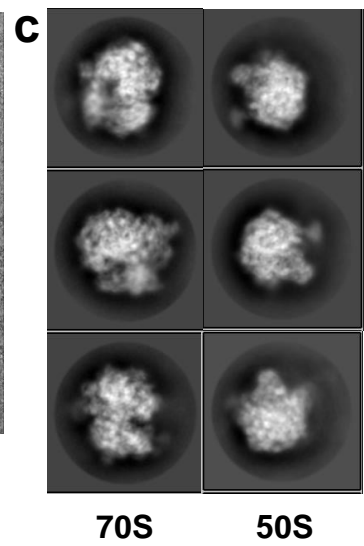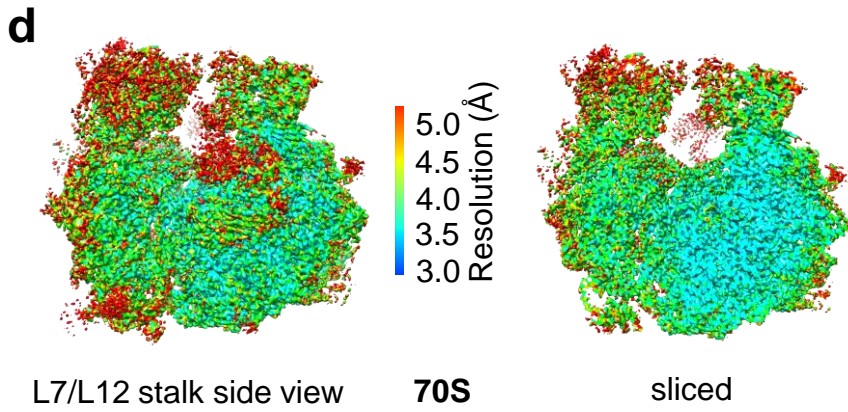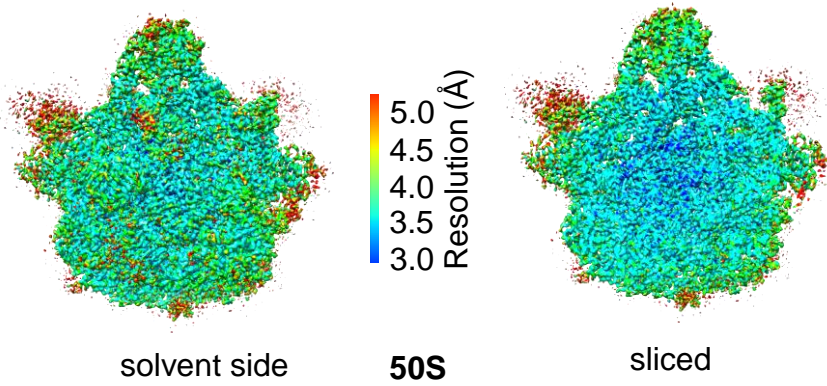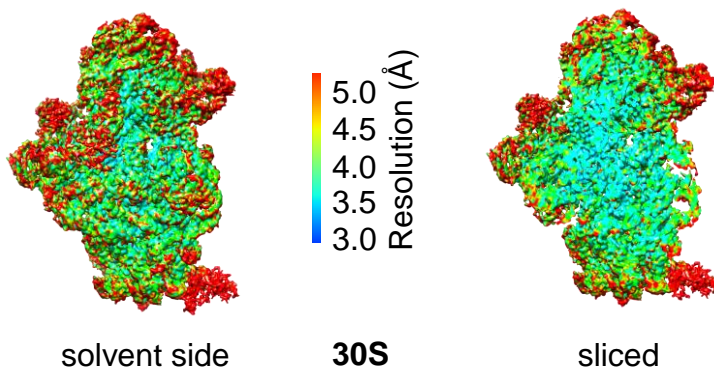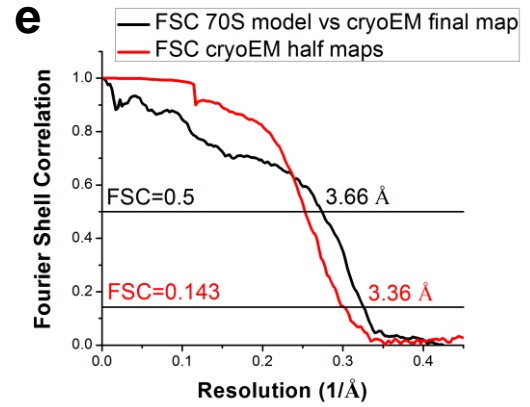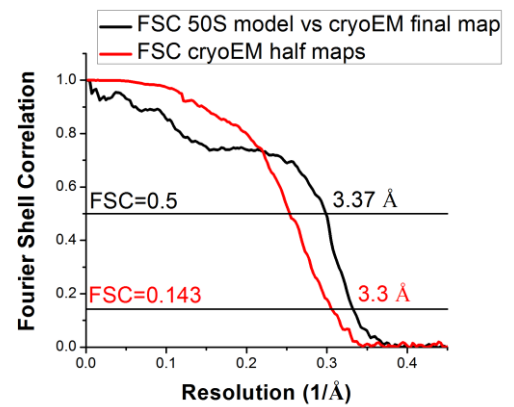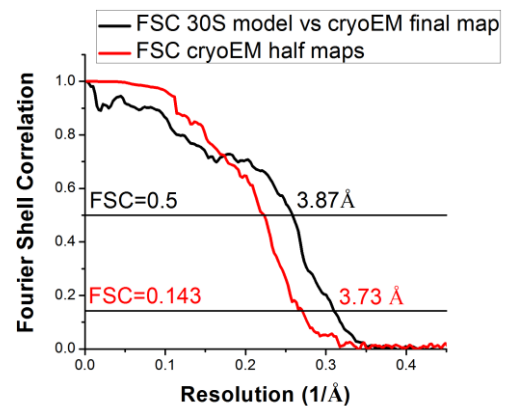

# Figure S2

a

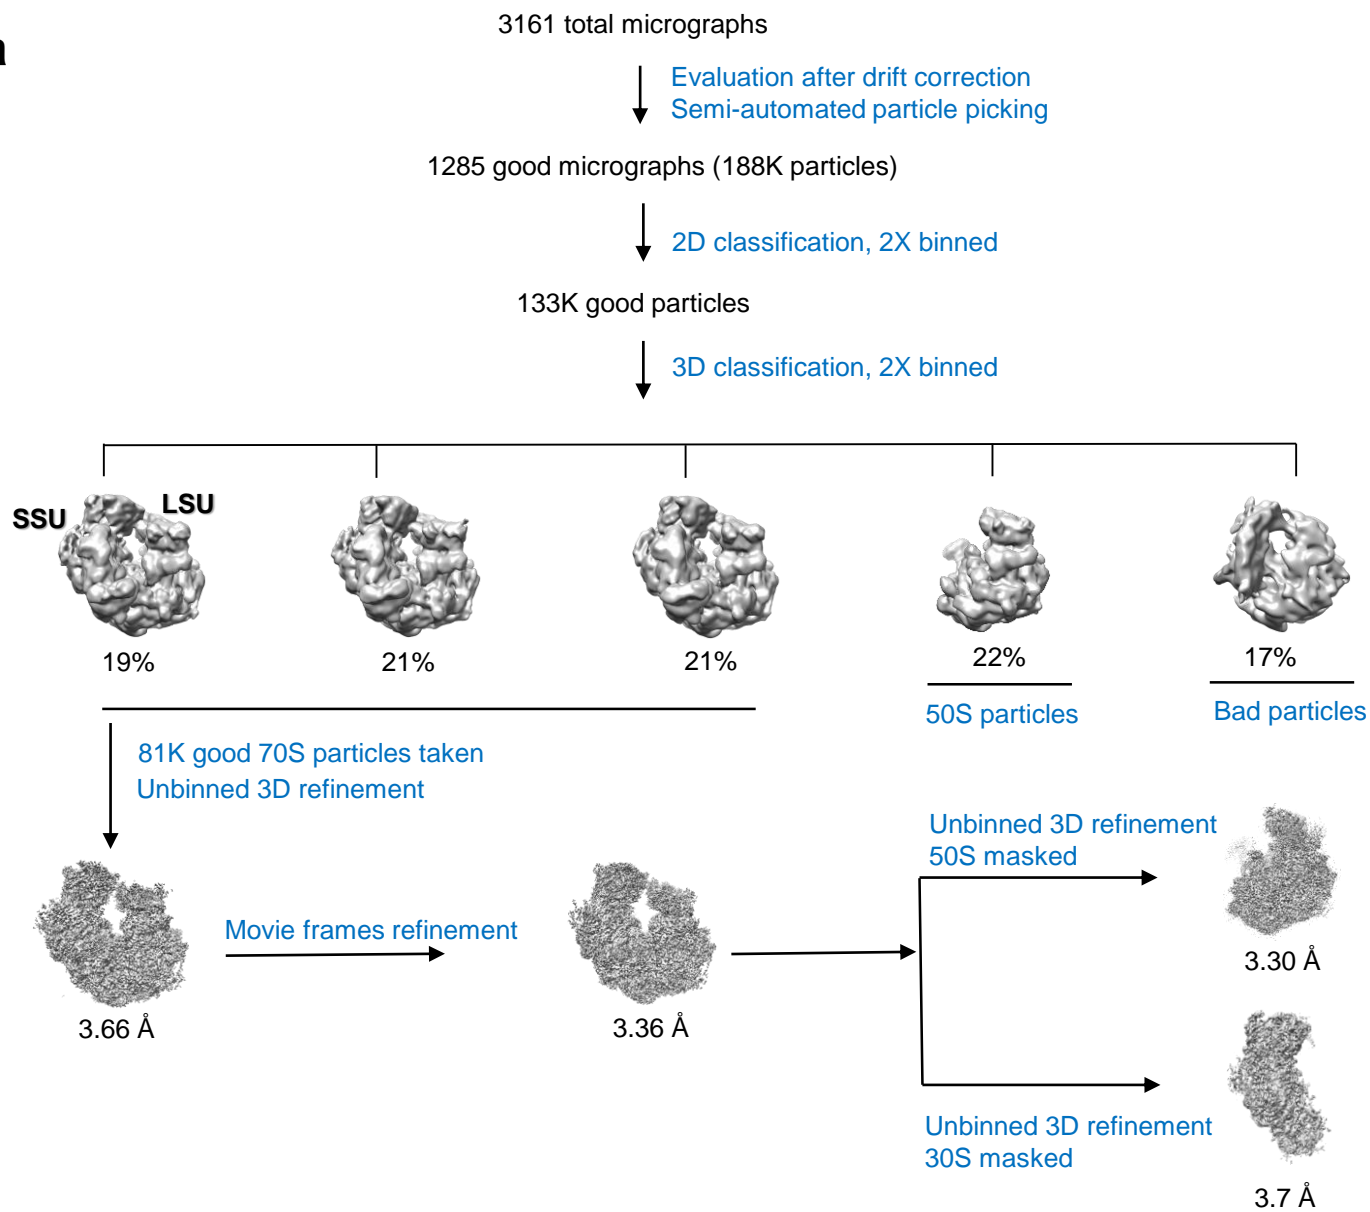

b

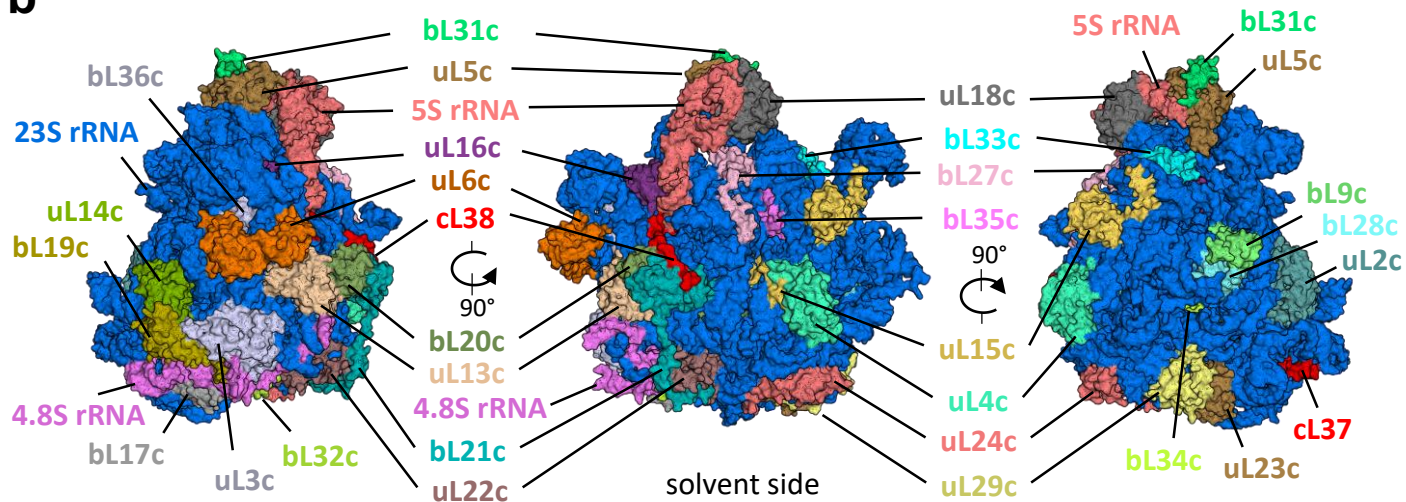

# Figure S3

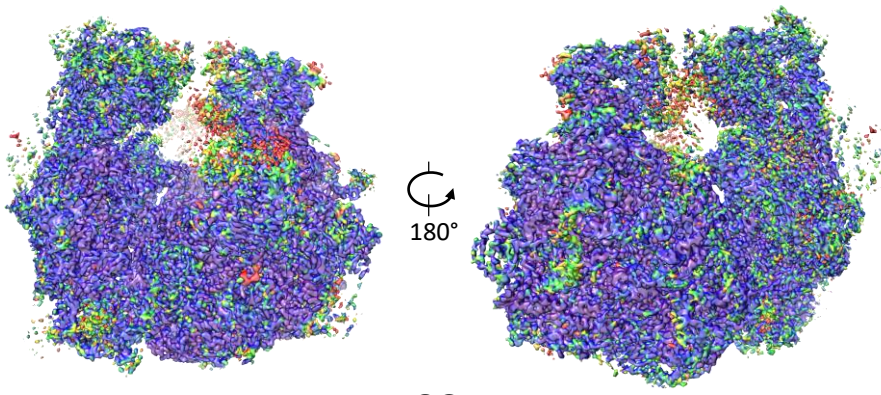

L7/L12 stalk side

**70S**

L1 stalk side

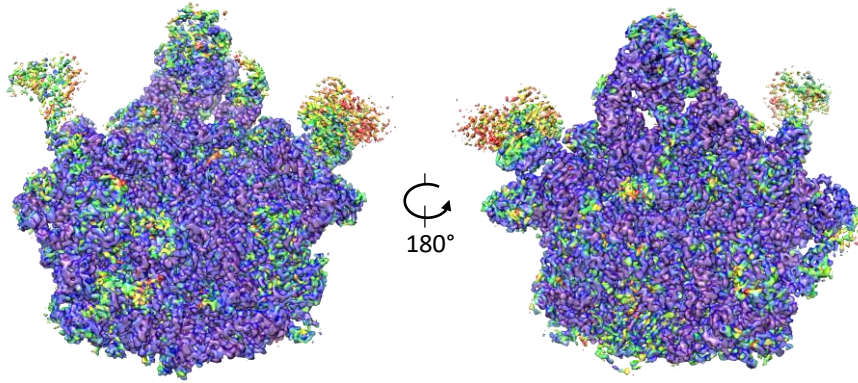

intersubunit side

**50S**

solvent side

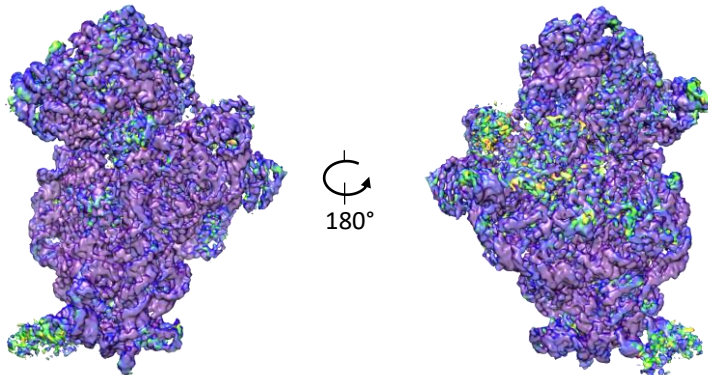

intersubunit side

**30S**

solvent side

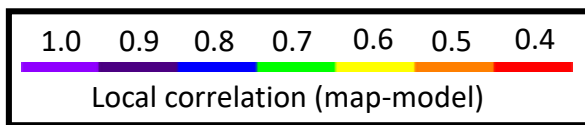

**Figure S4**

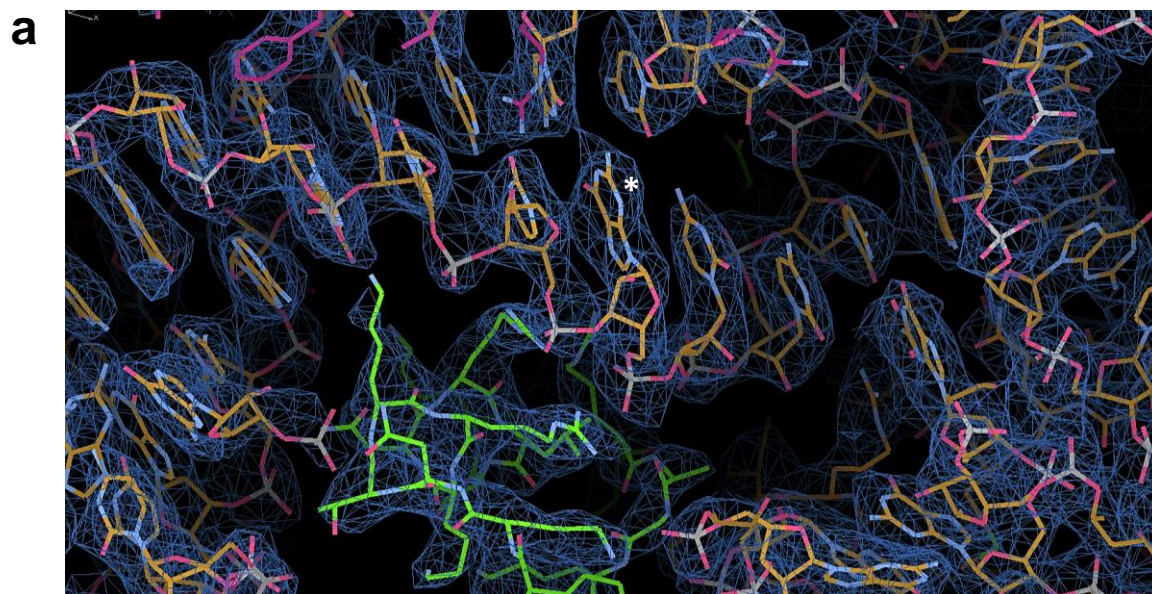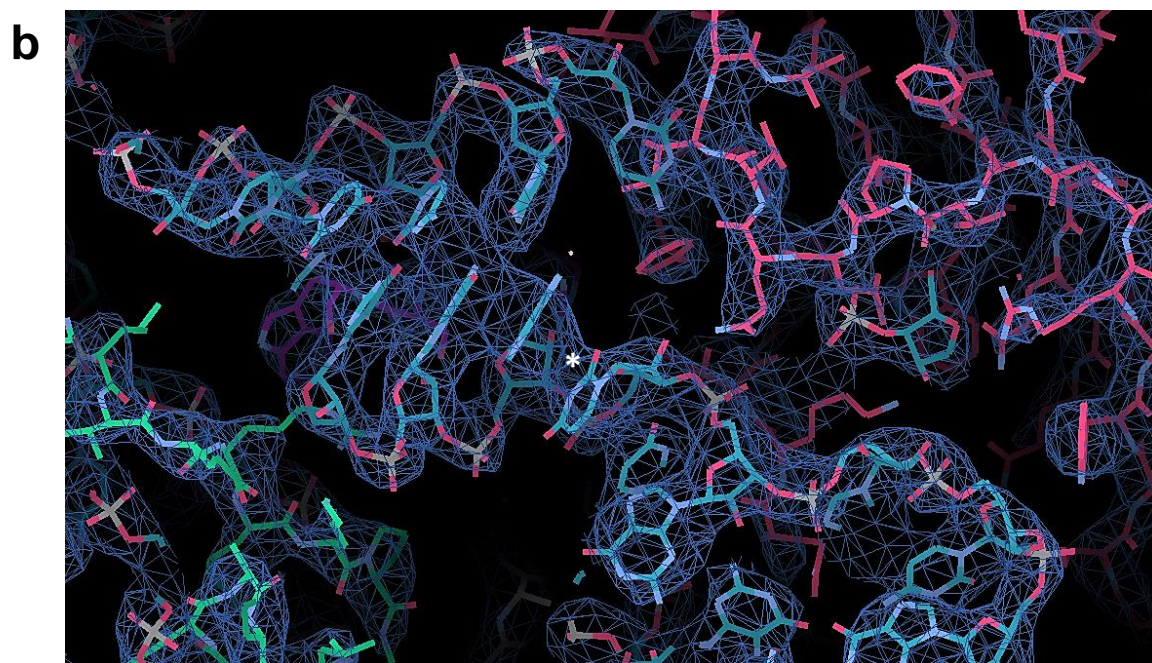

**Figure S5**

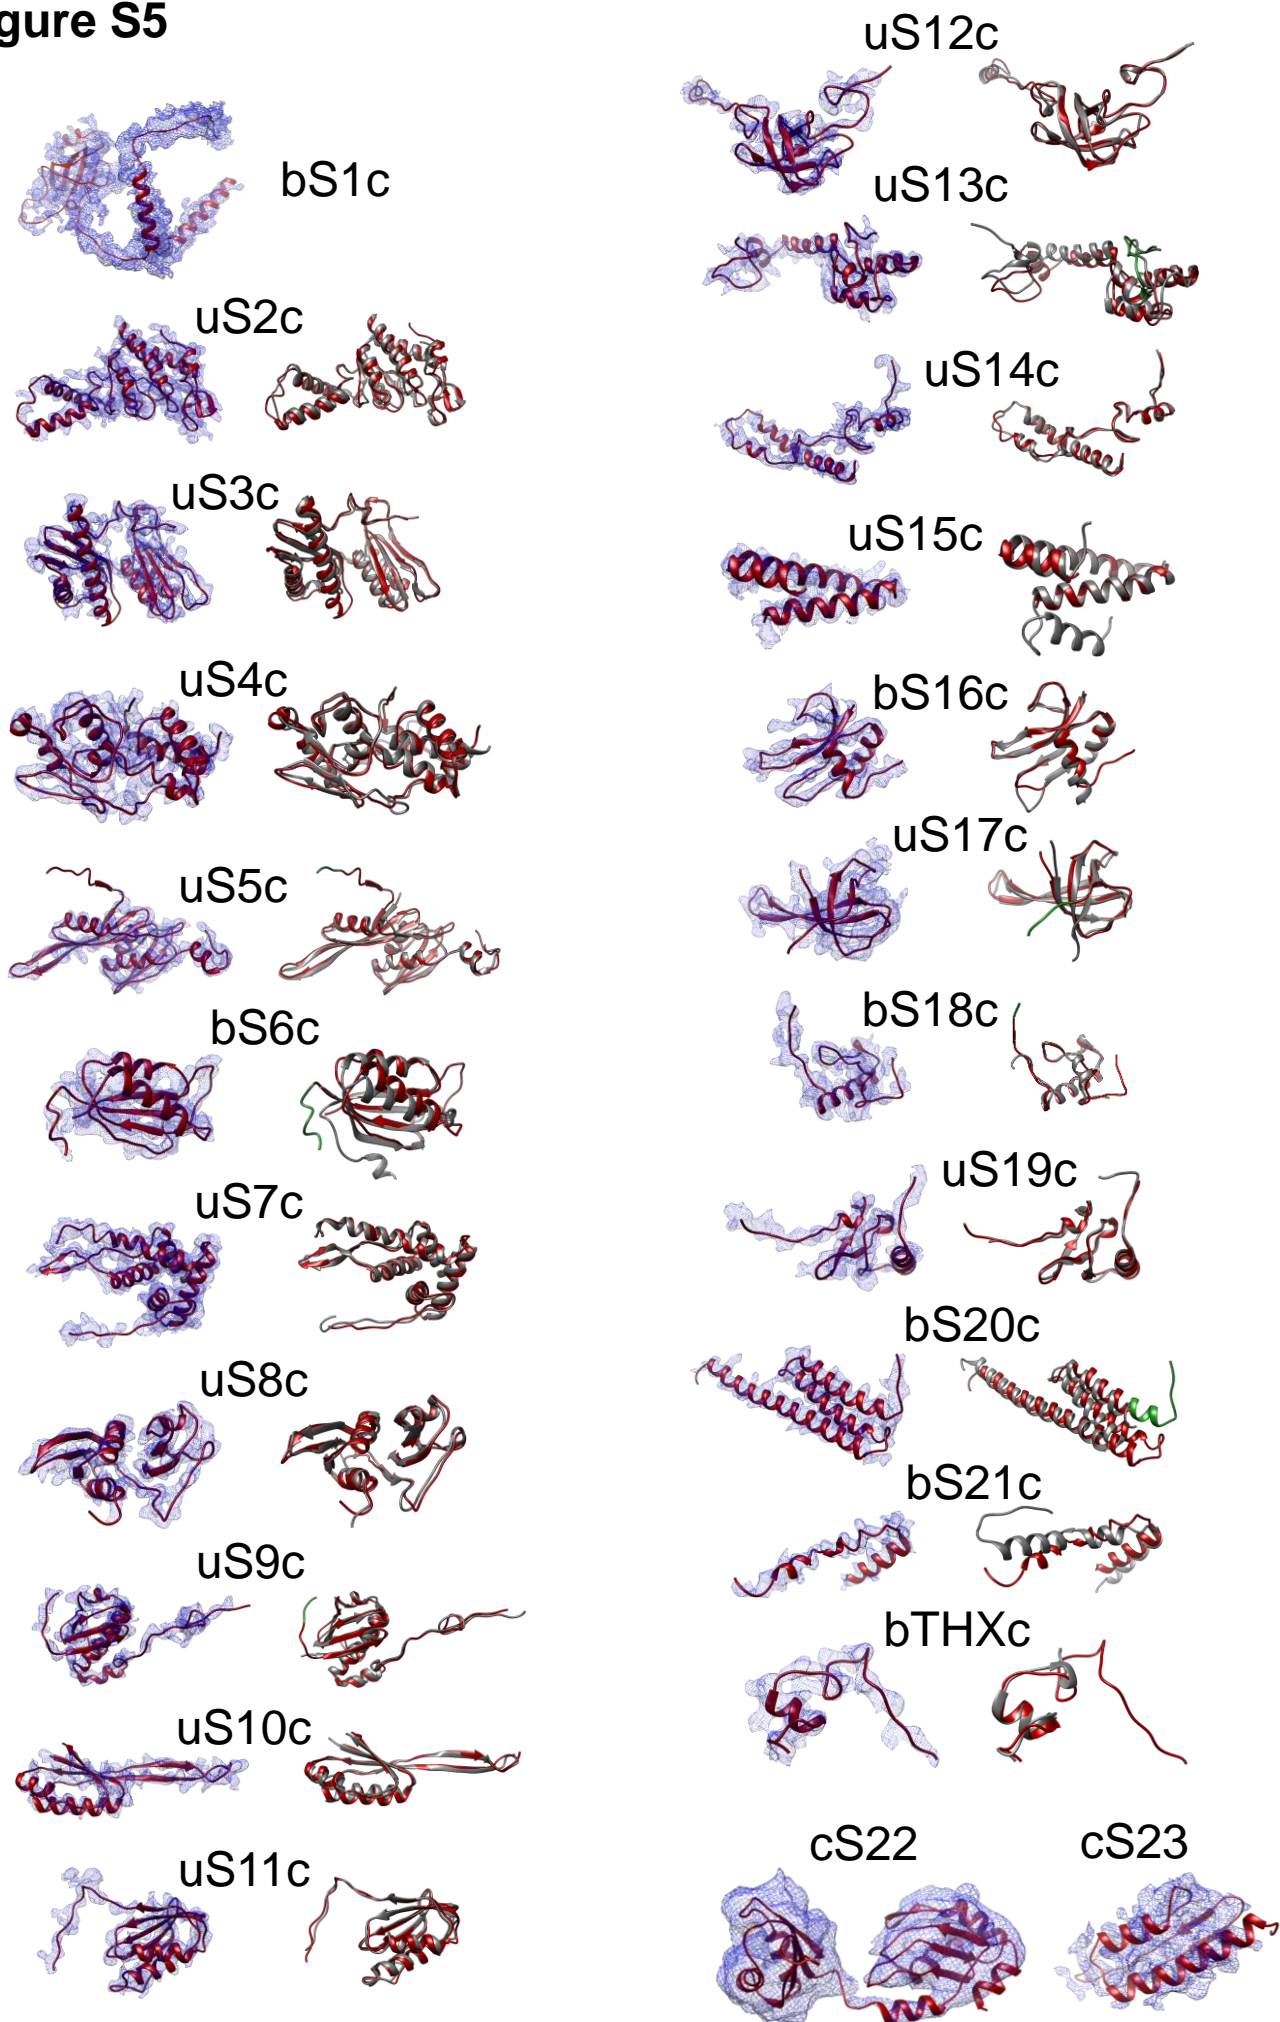



# Figure S6

**a**

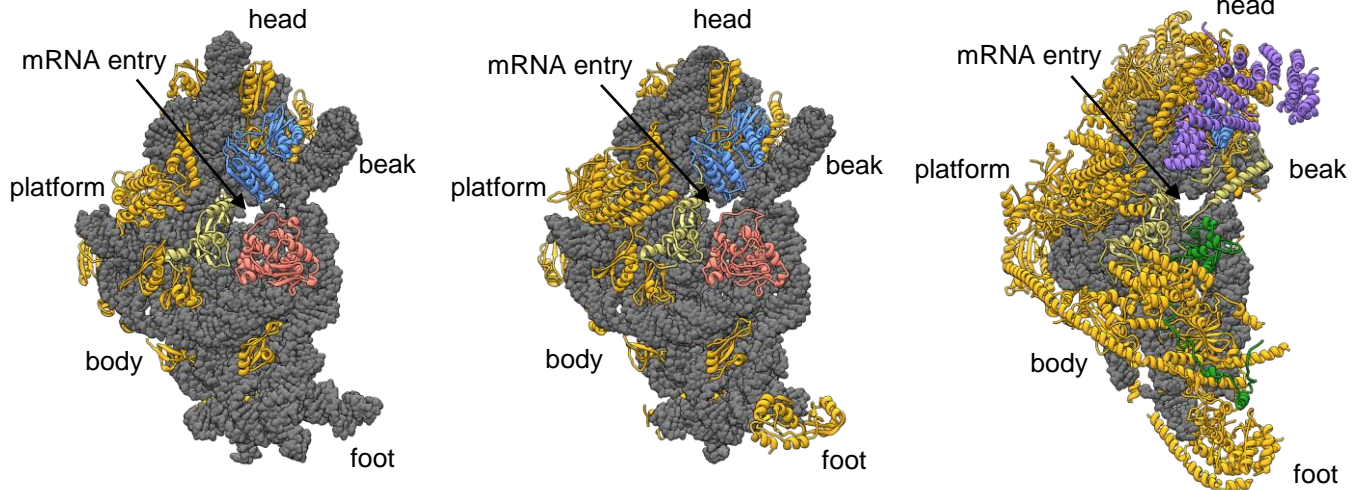

**b**

**bacterial 30S                      chloroplast 30S                      mitochondrial 30S**

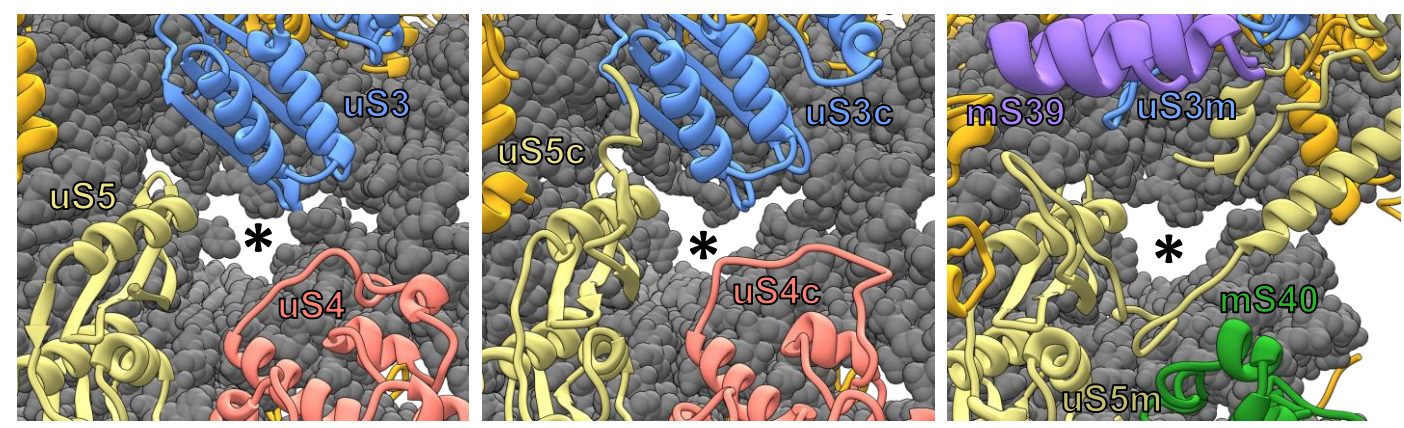

**Figure S7**

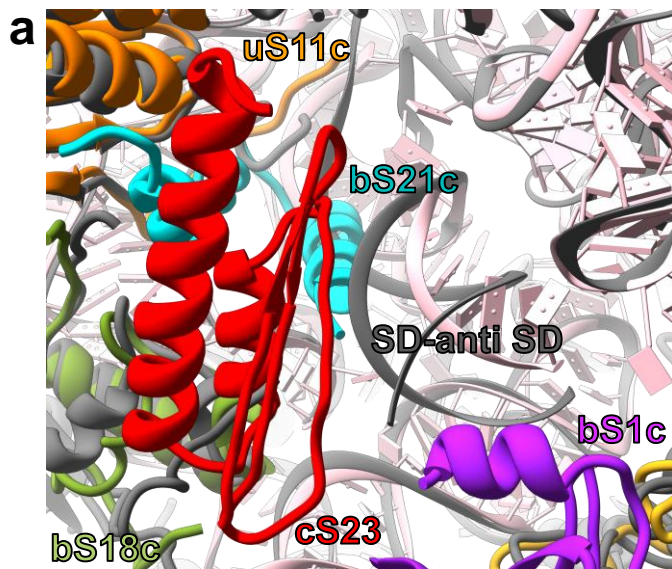

**b**

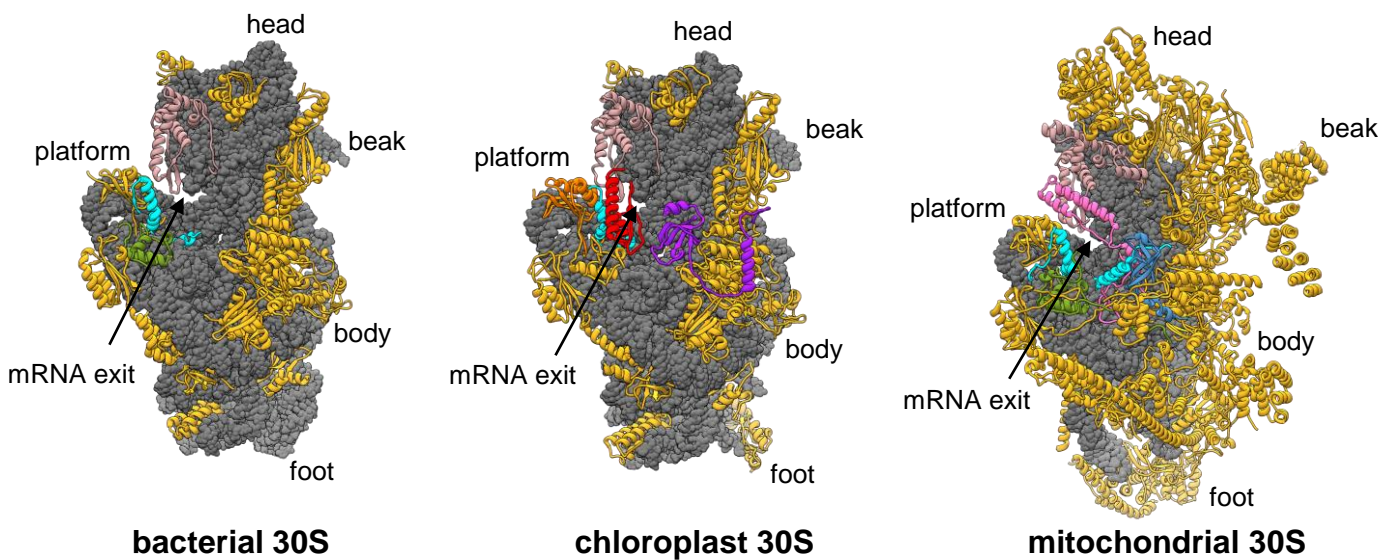

**c**

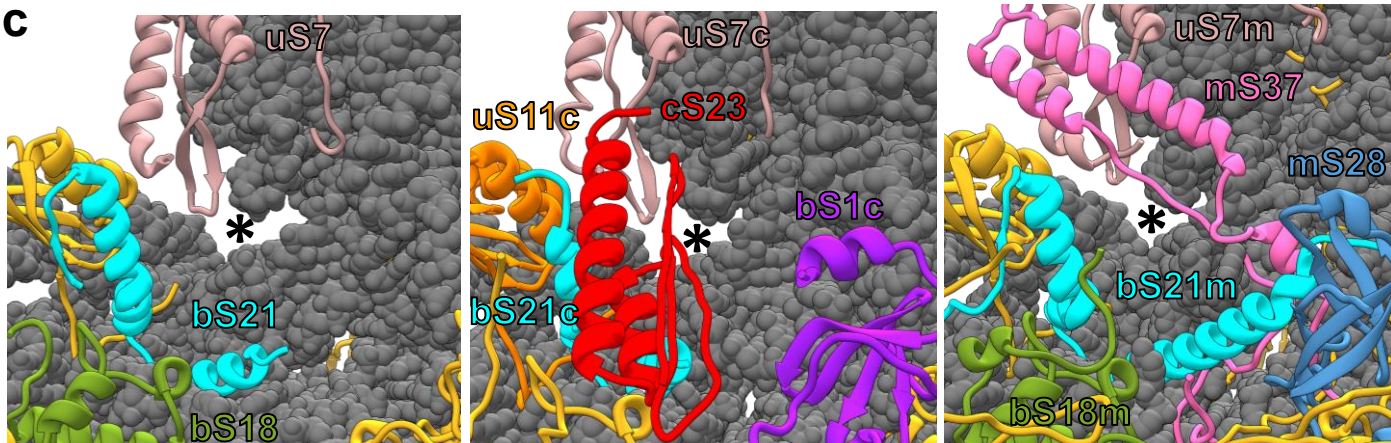



**Figure S9**

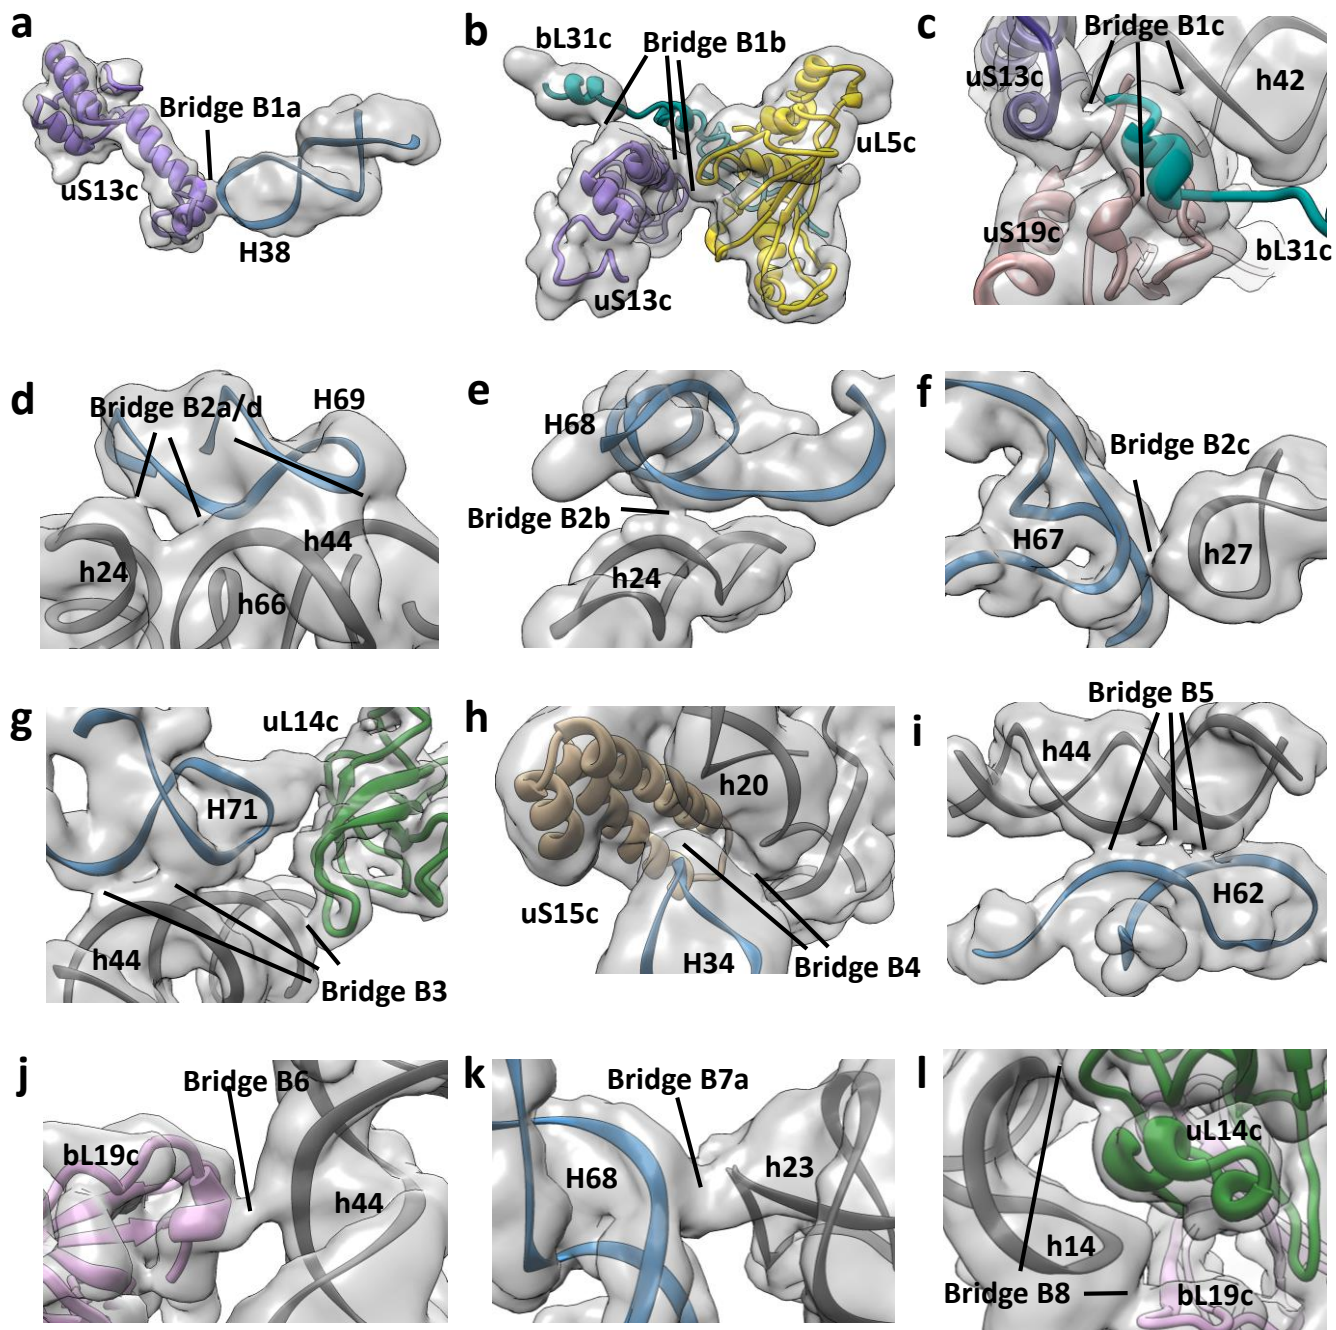

Supplement: gkx499_supp.pdf [file gkx499_supp.pdf]
